# Supplementary material for: Meeting need vs. sharing the market: a systematic review of methods to measure the use of private sector family planning and childbirth services in sub-Saharan Africa
Source: Springer Nature journal article supplement (doi:10.1186/s12913-018-3514-y), 2018-09-10
Supplement: MOESM4 [file 16111124]

| Sub-region & Country              | Period    |             |             |             |             |             |             |
|-----------------------------------|-----------|-------------|-------------|-------------|-------------|-------------|-------------|
|                                   | 1981-1985 | 1986-1990   | 1991-1995   | 1996-2000   | 2001-2005   | 2006-2010   | 2011-2015   |
| <b>West &amp; Central Africa</b>  |           |             |             |             |             |             |             |
| Benin                             |           |             |             | 2-4 studies | 5+ studies  | 5+ studies  |             |
| Burkina Faso                      |           |             | 2-4 studies | 2-4 studies | 5+ studies  | 2-4 studies |             |
| Cameroon                          |           |             | 2-4 studies | 5+ studies  | 5+ studies  |             | 2-4 studies |
| Cape Verde                        |           |             |             |             |             |             |             |
| Central African Republic          |           |             | 5+ studies  |             |             |             |             |
| Chad                              |           |             |             | 2-4 studies | 5+ studies  |             |             |
| Congo-Brazzaville                 |           |             |             |             | 5+ studies  |             |             |
| Cote d'Ivoire                     |           |             | 2-4 studies | 2-4 studies |             |             |             |
| Democratic Republic of the Congo  | 1 study   |             |             |             |             | 5+ studies  |             |
| Equatorial Guinea                 |           |             |             |             |             |             |             |
| Gabon                             |           |             |             | 2-4 studies |             |             | 2-4 studies |
| Gambia                            |           |             |             |             |             |             |             |
| Ghana                             |           | 2-4 studies | 5+ studies  | 5+ studies  | 5+ studies  | 5+ studies  |             |
| Guinea                            |           |             | 1 study     | 2-4 studies | 5+ studies  |             |             |
| Guinea Bissau                     |           |             |             |             |             |             |             |
| Liberia                           |           | 5+ studies  |             |             |             | 5+ studies  |             |
| Mali                              |           | 2-4 studies | 1 study     | 2-4 studies | 5+ studies  | 5+ studies  | 1 study     |
| Mauritania                        |           |             |             | 1 study     | 1 study     |             |             |
| Niger                             |           |             | 2-4 studies | 2-4 studies | 1 study     | 5+ studies  |             |
| Nigeria*                          |           | 2-4 studies |             | 2-4 studies | 5+ studies  | 5+ studies  |             |
| Sao Tome & Principe               |           |             |             |             |             | 2-4 studies |             |
| Senegal                           |           | 2-4 studies | 2-4 studies | 2-4 studies | 2-4 studies |             | 5+ studies  |
| Sierra Leone                      |           |             | 1 study     |             |             | 5+ studies  |             |
| Togo                              |           | 2-4 studies |             | 2-4 studies |             |             |             |
| <b>East &amp; Southern Africa</b> |           |             |             |             |             |             |             |
| Angola                            |           |             |             |             |             | 1 study     |             |
| Botswana                          |           | 5+ studies  |             |             |             |             |             |
| Burundi                           |           | 5+ studies  |             |             |             | 2-4 studies |             |
| Comoros                           |           |             |             | 2-4 studies |             |             |             |
| Djibouti                          |           |             |             |             |             |             |             |
| Eritrea                           |           |             | 1 study     |             | 2-4 studies |             |             |
| Ethiopia                          |           |             |             | 2-4 studies | 5+ studies  |             | 2-4 studies |
| Kenya                             | 1 study   | 2-4 studies | 2-4 studies | 5+ studies  | 5+ studies  | 5+ studies  | 2-4 studies |
| Lesotho                           |           |             |             |             | 1 study     | 2-4 studies |             |
| Madagascar                        |           |             | 2-4 studies | 2-4 studies | 2-4 studies | 5+ studies  |             |
| Malawi                            |           |             | 2-4 studies | 5+ studies  | 2-4 studies | 5+ studies  |             |
| Mauritius                         |           |             |             |             |             |             |             |
| Mozambique                        |           |             |             | 2-4 studies | 2-4 studies |             | 2-4 studies |
| Namibia                           |           |             | 2-4 studies | 2-4 studies |             | 5+ studies  |             |
| Rwanda                            |           |             | 2-4 studies | 5+ studies  | 5+ studies  | 5+ studies  |             |
| Seychelles                        |           |             |             |             |             |             |             |
| Somalia                           |           |             |             |             |             |             |             |
| South Africa                      |           |             |             | 2-4 studies |             |             |             |
| South Sudan                       |           |             |             |             |             |             |             |
| Sudan                             |           | 5+ studies  |             |             |             |             |             |
| Swaziland                         |           |             |             |             |             | 5+ studies  |             |
| Tanzania                          |           |             | 1 study     | 5+ studies  | 5+ studies  | 5+ studies  |             |
| Uganda                            |           | 2-4 studies | 2-4 studies | 2-4 studies | 2-4 studies | 5+ studies  | 5+ studies  |
| Zambia                            |           |             | 1 study     | 2-4 studies | 5+ studies  | 5+ studies  |             |
| Zimbabwe                          | 1 study   | 1 study     | 2-4 studies | 2-4 studies | 1 study     | 2-4 studies | 2-4 studies |

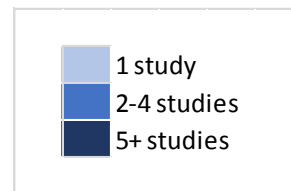

\*Two studies excluded because authors omitted the dates of data collection.
